# Supplementary material for: Electrode engineering starting from live biomass: a ‘smart’ way to construct smart pregnant hybrids for sustainable charge storage devices
Source: Royal Society of Chemistry journal article supplement (doi:10.1039/c9qm00019d), 2019-01-01
Supplement: c9qm00019d1.pdf [file c9qm00019d1.pdf]

## Electrode engineering begins from live biomass: a “smart” way to construct smart pregnant hybrids for sustainable charge storage devices

Jian Jiang<sup>||, a\*</sup>, Siyuan Liu<sup>||, a</sup>, Yani Liu,<sup>a</sup> Ting Meng,<sup>a</sup> Lai Ma,<sup>a</sup> Han Zhang,<sup>a</sup> Maowen Xu,<sup>a</sup> Jianhui Zhu,<sup>b\*</sup> and Chang Ming Li<sup>a\*</sup>

<sup>a</sup>*School of Materials and Energy, and Chongqing Key Lab for Advanced Materials and Clean Energies of Technologies, Southwest University, No.2 Tiansheng Road, BeiBei District, Chongqing 400715, P.R. China.*

<sup>b</sup>*School of Physical Science and Technology, Southwest University, No.2 Tiansheng Road, BeiBei District, Chongqing 400715, P.R. China.*

To whom correspondence should be addressed: Tel: +86-23-68254842.

\*E-mail: [jhzhu@swu.edu.cn](mailto:jhzhu@swu.edu.cn) (J. Zhu); [jjjiang@swu.edu.cn](mailto:jjjiang@swu.edu.cn) (J. Jiang); [ecmli@swu.edu.cn](mailto:ecmli@swu.edu.cn) (C.M.Li).

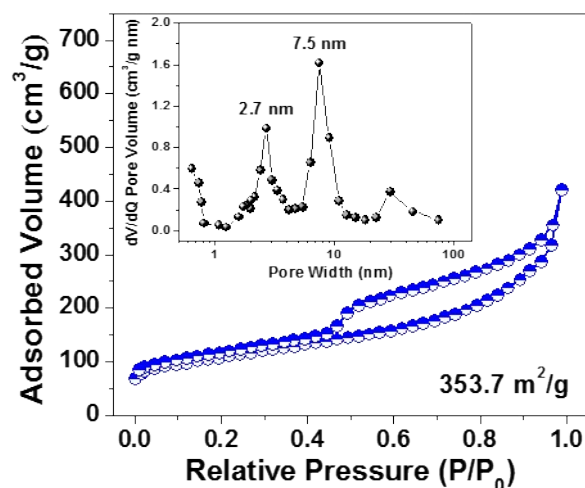

**Fig. S1.** N<sub>2</sub> adsorption/desorption isotherm and pore-size distribution plot of Fe<sub>3</sub>O<sub>4</sub>@YE-C.

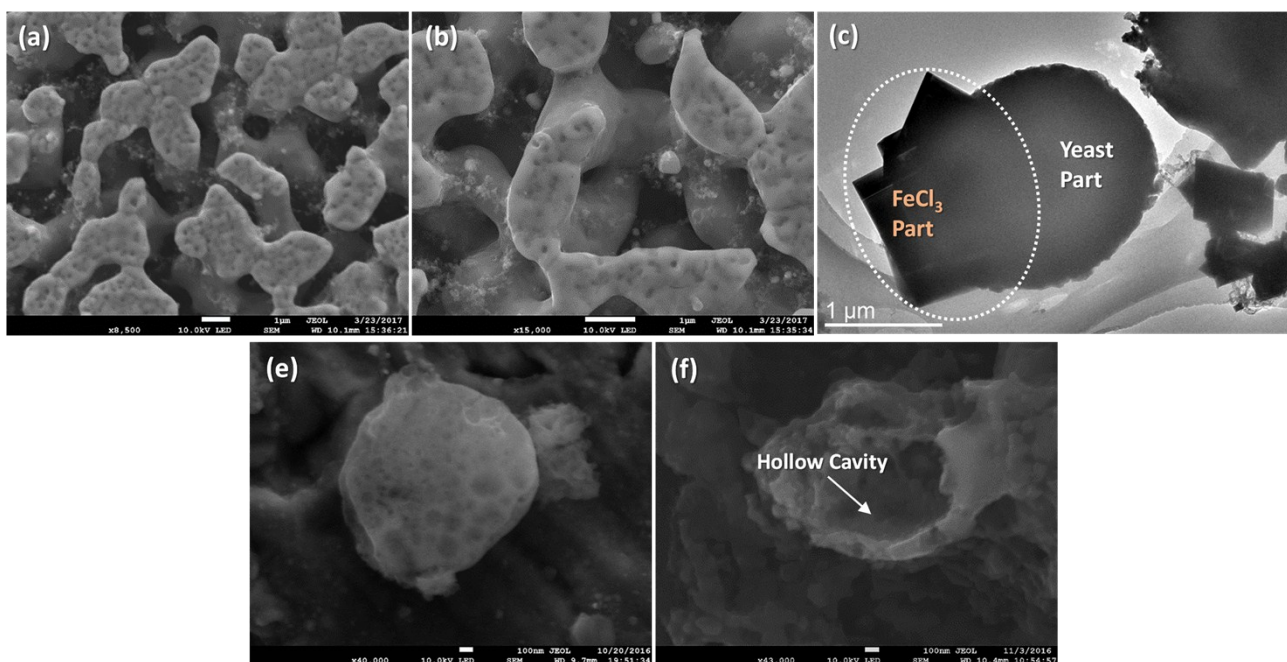

**Fig. S2.** (a-b) SEM and (c) TEM images of unclean samples after the ion-diffusion procedure. (e-f) SEM observations of remained products after an acid washing treatment toward Fe<sub>3</sub>O<sub>4</sub>@YE-C.

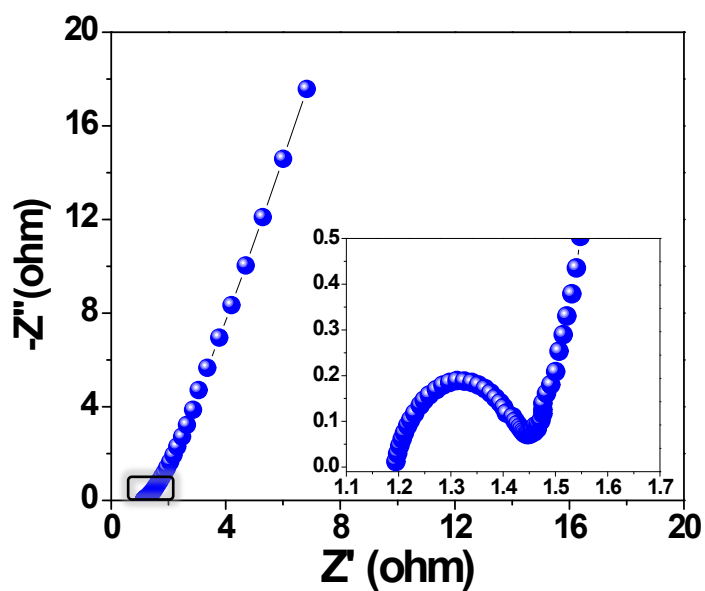

**Fig. S3.** EIS spectrum of single Fe<sub>3</sub>O<sub>4</sub>@YE-C electrode.

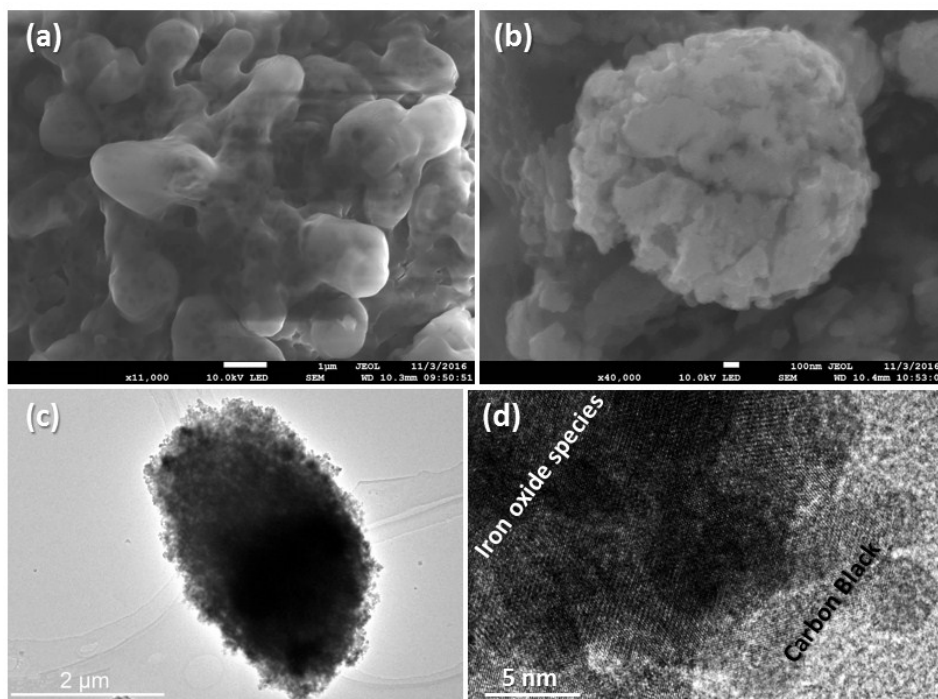

**Fig. S4.** (a-b) SEM and (c-d) TEM images of cycled  $\text{Fe}_3\text{O}_4@\text{YE-C}$  electrodes.

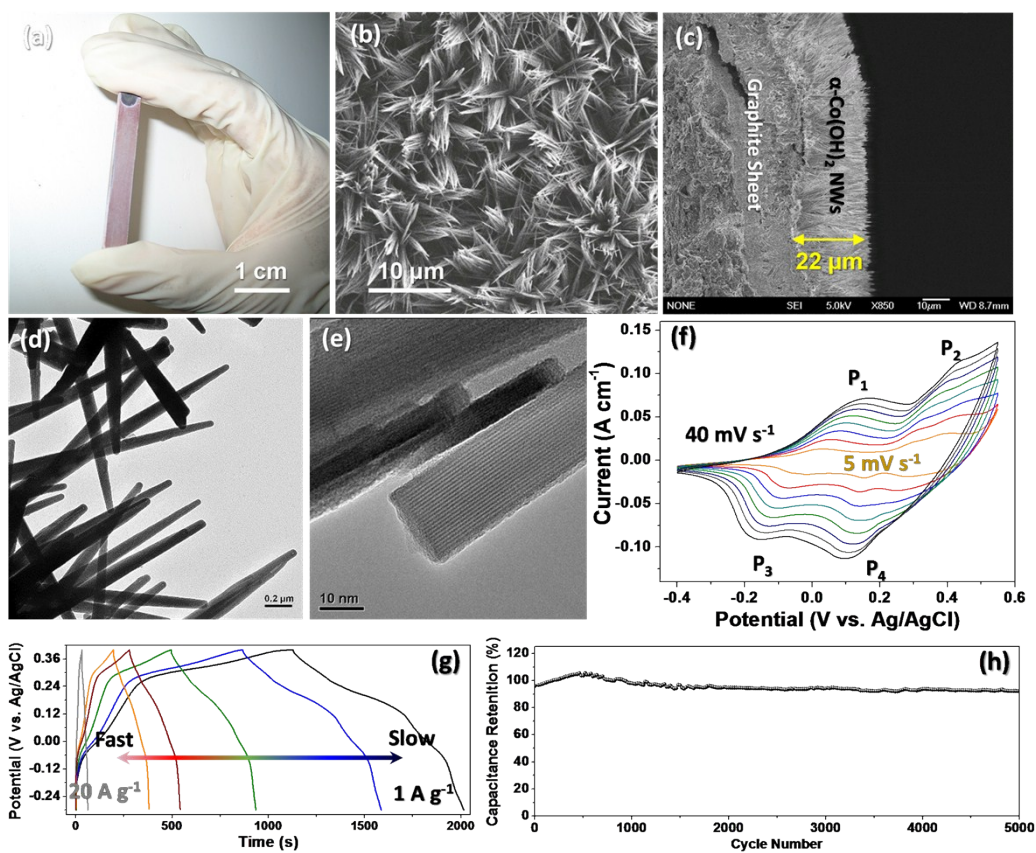

**Fig. S5.** (a) Optical, (b-c) SEM and (d-e) TEM images of  $\text{Co}(\text{OH})_2$  NWs grown on the graphite sheet. (f) CV plots, (g) constant charge/discharge profiles and (h) long-term cyclic performance of  $\text{Co}(\text{OH})_2$  NWs cathode.
